# Supplementary material for: Unprecedented formation of an acetamidate-bridged dinuclear platinum(ii) terpyridyl complex—correlation of luminescence properties with the crystal forms and dimerization studies in solution
Source: Royal Society of Chemistry journal article supplement (doi:10.1039/b606352g), 2006-01-01
Supplement: b606352g.pdf [file b606352g.pdf]

**Unprecedented formation of an acetamidate-bridged dinuclear platinum(II) terpyridyl complex – Correlation of luminescence properties with the crystal forms and dimerization studies in solution**

Keith Man-Chung Wong,\* Nianyong Zhu and Vivian Wing-Wah Yam\*

**Supplementary Information**

**Characterization:**

**1:** Yield: 80 %. <sup>1</sup>H NMR (400 MHz, acetone-d<sub>6</sub>, 298 K, relative to Me<sub>4</sub>Si): δ 9.03 (d with Pt satellite, *J* = 5.5 Hz, *J*<sub>Pt-H</sub> 40 Hz, 2 H, trpy), 8.84 (d with Pt satellite, *J* = 5.5 Hz, *J*<sub>Pt-H</sub> 40 Hz, 2H, trpy), 8.68 (m, 2 H, trpy), 8.52 (d, 12 H, trpy), 7.93 (m, 2 H, trpy), 7.87 (m, 2 H, trpy), 2.87 (s, 3 H, CH<sub>3</sub>); positive FAB-MS: *m/z* 1212 [M – OTf]<sup>+</sup>, 1063 [M – 2OTf]<sup>+</sup>, 914 [M – 3OTf]<sup>+</sup>; elemental analyses calcd for C<sub>35</sub>H<sub>26</sub>F<sub>9</sub>N<sub>7</sub>O<sub>10</sub>Pt<sub>2</sub>S<sub>3</sub> (found): C 30.86 (30.63), H 1.91 (1.85), N 7.20 (7.00).

Table S1 Photophysical data for **1**.

| Complex       | Medium ( <i>T</i> [K]) | Absorption                                                                                                  | Emission                              |
|---------------|------------------------|-------------------------------------------------------------------------------------------------------------|---------------------------------------|
|               |                        | $\lambda_{max}$ [nm] ( $\epsilon_{max}$ [dm <sup>3</sup> mol <sup>-1</sup> cm <sup>-1</sup> ]) <sup>a</sup> | $\lambda_{max}$ [nm] ( $\tau_o$ [μs]) |
| <b>1</b>      | MeCN (298)             | 326 (23710), 338 (29305), 366 (5840), 386 (4090),<br>426 (1510), 458 (1090), 478 (700)                      | 597 (0.15), [788] <sup>b</sup>        |
| <b>1-red</b>  | Solid (298)            |                                                                                                             | 690 (0.4)                             |
|               | Solid (77)             |                                                                                                             | 762 (1.1)                             |
| <b>1-dark</b> | Solid (298)            |                                                                                                             | 750 (0.2)                             |
|               | Solid (77)             |                                                                                                             | 805 (– <sup>c</sup> )                 |

<sup>a</sup> Concentration < 2×10<sup>-5</sup> M

<sup>b</sup> New emission peak appeared when concentration > 1×10<sup>-3</sup> M

<sup>c</sup> Not determined

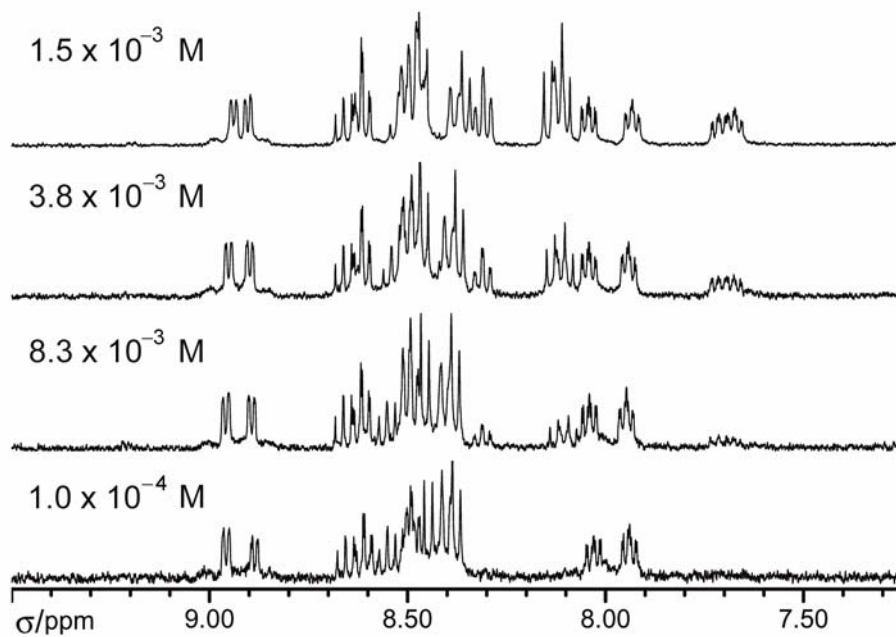

**Figure S1**

Figure S1 Concentration-dependent <sup>1</sup>H NMR spectra of **1** in CD<sub>3</sub>CN at room temperature.

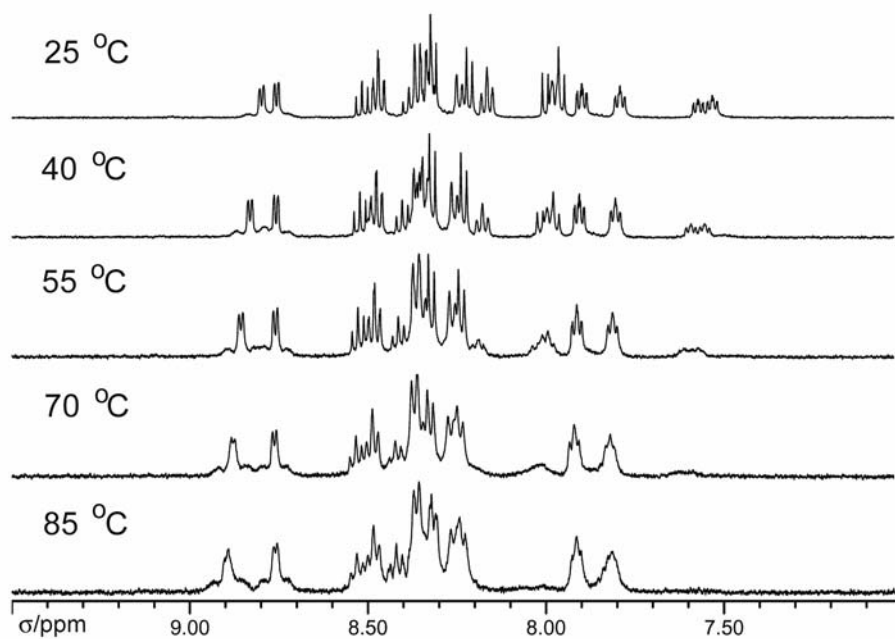

**Figure S2**

Figure S2 Variable-temperature  $^1\text{H}$  NMR spectra of **1** in  $\text{CD}_3\text{CN}$  (conc. =  $3.8 \times 10^{-3}\text{M}$ )
